# Supplementary material for: Cyanophenyl spiro[acridine-9,9′-fluorene]s as simple structured hybridized local and charge-transfer-based ultra-deep blue emitters for highly efficient non-doped electroluminescent devices (CIEy ≤ 0.05)
Source: Royal Society of Chemistry journal article supplement (doi:10.1039/d1tc00406a), 2021-01-01
Supplement: d1tc00406a1.pdf [file d1tc00406a1.pdf]

## Supporting Information

### Cyanophenyl spiro[acridine-9,9'-fluorene]s as simple structured hybridized local and charge-transfer-based ultra-deep blue emitters for highly efficient non-doped electroluminescent devices (CIE<sub>y</sub> ≤ 0.05)

Taweesak Sudyoasuk,<sup>a</sup> Sujinda Petdee,<sup>a</sup> Chokchai Kaiyasuan,<sup>a</sup> Chaiyon Chaiwai,<sup>a</sup> Praweena Wongkaew,<sup>b</sup> Supawadee Namuangruk,<sup>c</sup> Pongsakorn Chasing<sup>a</sup> and Vinich Promarak<sup>\*ab</sup>

<sup>a</sup> Department of Materials Science and Engineering, School of Molecular Science and Engineering, Vidyasirimedhi Institute of Science and Technology, Wangchan, Rayong 21210, Thailand.

E-mail: vinich.p@vistec.ac.th

<sup>b</sup> Research Network of NANOTEC-VISTEC on Nanotechnology for Energy, Vidyasirimedhi Institute of Science and Technology, Wangchan, Rayong, 21210, Thailand.

<sup>c</sup> National Nanotechnology Center (NANOTEC), National Science and Technology Development Agency, Pathum Thani 12120, Thailand

#### 1. Material Synthesis

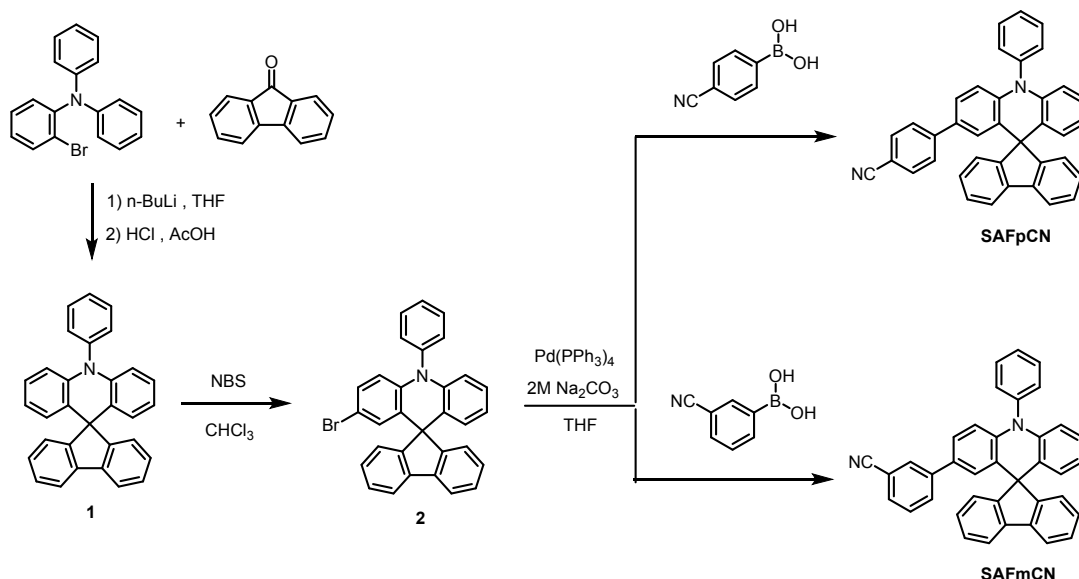

Scheme S1

#### 10-Phenyl-10H-spiro[acridine-9,9'-fluorene] (**1**)

A solution of 2-bromotriphenylamine (3.22 g, 9.95 mmol) in THF (80 ml) in 250 ml three-necked round bottom flask was degassed with N<sub>2</sub> for 5 min. The solution was cooled to -78 °C for 30 min, and then 1.6M n-Butyl lithium in hexane (9.40 ml, 14.9330 mmol) was added dropwise via syringe. The resulting mixture was allowed to stir at -78 °C for 1 h, and then a solution of 9-fluorenone (1.79 g, 9.95 mmol) in THF (80 ml) was slowly added via additional funnel for 30 min. After 1 h reaction at -78 °C, for 1 h, the reaction mixture was warmed up to room temperature and stirred overnight. Water (20 ml) was added to the reaction mixture and THF was evaporated by rotary evaporator. The resulting mixture was extracted with DCM, washed with water and brine solution, dried over

anhydrous Na<sub>2</sub>SO<sub>4</sub> and removed organic solvent, respectively. The light yellow crude product was dissolved in acetic acid (50 ml) and 37% HCl (5 ml) and then refluxed for 4 h. After cooling to room temperature, the precipitate was filtrated and washed with hexane. The resulting solid was purified by silica gel column chromatography using hexane as eluent to obtain a white solid (2.70 g, 67%). <sup>1</sup>H NMR (600 MHz, CDCl<sub>3</sub>) δ 7.80 (d, *J* = 7.5 Hz, 2H), 7.71 (t, *J* = 7.4 Hz, 2H), 7.58 (t, *J* = 7.3 Hz, 1H), 7.51 (d, *J* = 7.4 Hz, 2H), 7.44 (d, *J* = 7.4 Hz, 2H), 7.38 (t, *J* = 7.3 Hz, 2H), 7.26 (t, *J* = 7.2 Hz, 2H), 6.92 (t, *J* = 7.6 Hz, 2H), 6.56 (t, *J* = 7.3 Hz, 2H), 6.41 (d, *J* = 7.6 Hz, 2H), 6.36 (d, *J* = 8.3 Hz, 2H). <sup>13</sup>C NMR (151 MHz, CDCl<sub>3</sub>) δ 156.62, 141.37, 141.17, 139.25, 131.24, 131.07, 128.45, 128.38, 127.76, 127.58, 127.19, 125.82, 124.85, 120.55, 119.88, 114.64, 56.89. MALDI-TOF *m/z* [M]<sup>+</sup> calcd for C<sub>31</sub>H<sub>21</sub>N 407.1674, found 407.3410.

### ***2-Bromo-10-phenyl-10H-spiro[acridine-9,9'-fluorene] (2)***

A solution of N-bromosuccinimide (0.087 g, 0.49 mmol) in chloroform (10 ml) was added dropwise to a solution of **1** (0.20 g, 0.49 mmol) in chloroform (20 ml). The mixture was stirred at room temperature for 1 h and then water (50 ml) was added. The mixture was extracted with DCM, washed with water and brine, dried over anhydrous Na<sub>2</sub>SO<sub>4</sub> and removed organic solvent, respectively. The crude product was purified by recrystallization from DCM/Methanol mixture solvent to give a white solid (0.21 g, 88%). <sup>1</sup>H NMR (600 MHz, CDCl<sub>3</sub>) δ 7.81 (d, *J* = 7.5 Hz, 2H), 7.72 (t, *J* = 7.8 Hz, 2H), 7.59 (t, *J* = 7.4 Hz, 1H), 7.48 (dd, *J* = 8.3, 1.1 Hz, 2H), 7.42 – 7.39 (m, 4H), 7.28 (td, *J* = 7.6, 0.9 Hz, 2H), 6.99 (dd, *J* = 8.9, 2.3 Hz, 1H), 6.92 (ddd, *J* = 8.5, 7.2, 1.5 Hz, 1H), 6.58 (td, *J* = 7.4, 1.0 Hz, 1H), 6.49 (d, *J* = 2.3 Hz, 1H), 6.38 (dd, *J* = 7.8, 1.4 Hz, 1H), 6.35 (d, *J* = 8.4 Hz, 1H), 6.24 (d, *J* = 8.9 Hz, 1H). <sup>13</sup>C NMR (151 MHz, CDCl<sub>3</sub>) δ 155.84, 140.93, 140.74, 140.61, 139.18, 131.22, 130.96, 130.11, 130.06, 128.71, 128.52, 127.90, 127.65, 127.36, 127.01, 125.68, 124.66, 120.94, 120.10, 116.37, 114.73, 112.66, 56.64. MALDI-TOF *m/z* [M]<sup>+</sup> calcd for C<sub>31</sub>H<sub>20</sub>BrN 485.0779, found 485.2946.

## 2. Characterization data

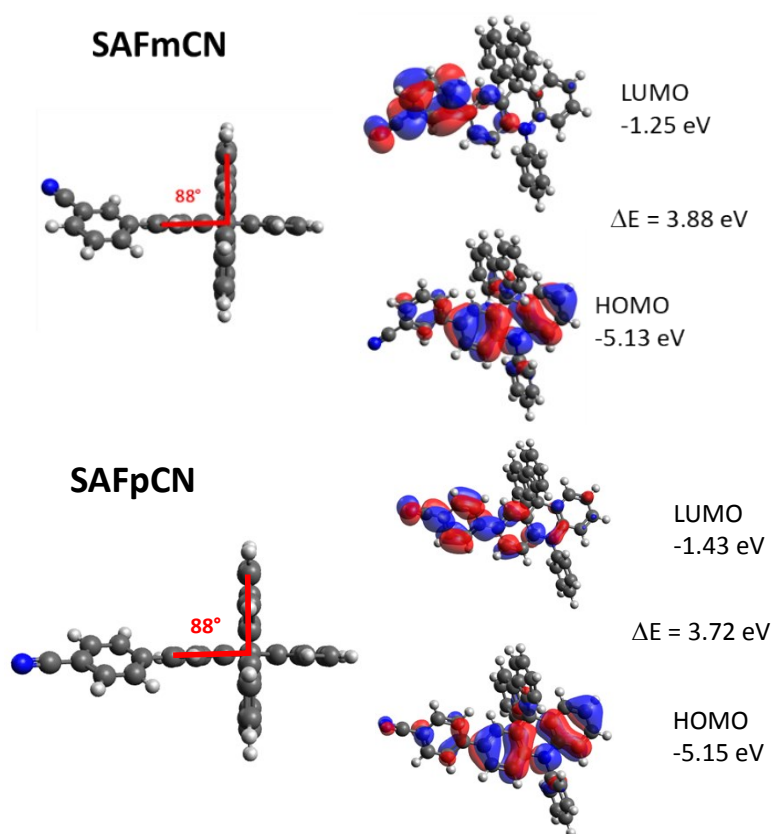

**Fig. S1** Optimized structures, and molecular orbital energy level and HOMO-LUMO energy gaps calculated by B3LYP/6-31G(d,p) function.

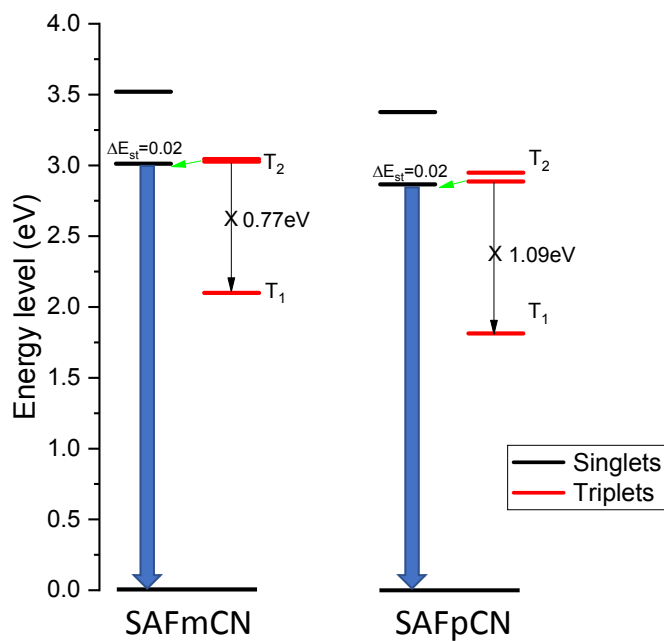

**Fig. S2** The energy diagram of singlet and triplet excited states of the compounds from TD-B3LYP/6-31G(d,p) calculations.

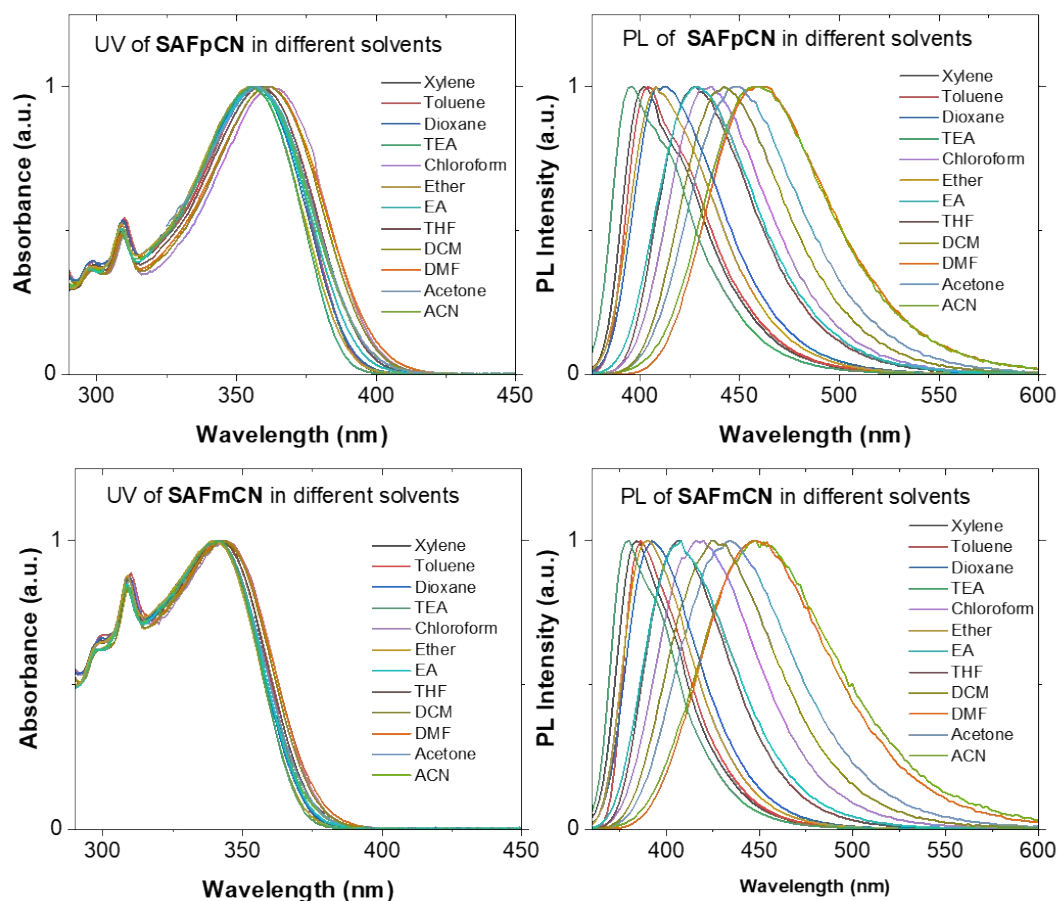

Fig. S3 UV-vis absorption and PL spectra in different solvents.

Table S1 Detail of the optical data in different solvents.

| Solvents           | $\epsilon$ | n     | $f(\epsilon, n)$ | SAFpCN           |                  |                                     | SAFmCN           |                  |                                     |
|--------------------|------------|-------|------------------|------------------|------------------|-------------------------------------|------------------|------------------|-------------------------------------|
|                    |            |       |                  | $\lambda_a$ (nm) | $\lambda_f$ (nm) | $\nu_a - \nu_f$ (cm <sup>-1</sup> ) | $\lambda_a$ (nm) | $\lambda_f$ (nm) | $\nu_a - \nu_f$ (cm <sup>-1</sup> ) |
| Xylene             | 2.57       | 1.496 | 0.003            | 358              | 402              | 3057                                | 343              | 384              | 3113                                |
| Toluene            | 2.38       | 1.494 | 0.015            | 357              | 404              | 3259                                | 343              | 386              | 3248                                |
| Dioxane            | 2.22       | 1.422 | 0.021            | 356              | 410              | 3700                                | 340              | 394              | 4031                                |
| Triethylamine      | 2.42       | 1.401 | 0.048            | 355              | 396              | 2916                                | 341              | 378              | 2870                                |
| Chloroform         | 4.81       | 1.446 | 0.148            | 363              | 434              | 4507                                | 344              | 418              | 5146                                |
| Ethyl ether        | 4.34       | 1.352 | 0.167            | 355              | 408              | 3659                                | 340              | 390              | 3771                                |
| Ethyl acetate      | 6.02       | 1.372 | 0.200            | 356              | 428              | 4725                                | 340              | 408              | 4902                                |
| Tetrahydrofuran    | 7.58       | 1.407 | 0.210            | 359              | 428              | 4491                                | 341              | 406              | 4695                                |
| Dichloromethane    | 8.93       | 1.424 | 0.217            | 361              | 442              | 5076                                | 343              | 427              | 5735                                |
| Dimethyl formamide | 37.0       | 1.427 | 0.274            | 361              | 460              | 5962                                | 342              | 448              | 6918                                |
| Acetone            | 20.7       | 1.359 | 0.284            | 357              | 448              | 5690                                | 340              | 434              | 6370                                |
| Acetonitrile       | 37.5       | 1.344 | 0.305            | 356              | 458              | 6256                                | 340              | 450              | 7190                                |

The dipole moment of ground state  $\mu_g$  can be estimated by DFT calculation, and the dipole moment of excited state are determined from the slope of linear fitted Stokes' shift ( $\nu_a - \nu_f$ ) against orientation polarizability  $f(\epsilon, n)$  in different solvents according to Lippert-Mataga equation.<sup>1</sup>

$$hc(\nu_a - \nu_f) = hc(\nu_a^0 - \nu_f^0) + \frac{2(\mu_e - \mu_g)^2}{a_0^3} f(\epsilon, n),$$

$$f(\epsilon, n) = \frac{\epsilon - 1}{2\epsilon + 1} + \frac{n^2 - 1}{2n^2 + 1},$$

Among which  $\epsilon$  and  $n$  are dielectric constant and refractive index of solvent respectively, and  $a_0$  is the solvent cavity radius

$$a_0 = \left(\frac{3M}{4N\pi d}\right)^{1/3},$$

where  $N$  is Avogadro number,  $M$  is molecular weight, and  $d$  is density. Two-region trends found in **mTAHPI**, **pTAHPI** and **pTAPI** are steady slopes of 4774, 5099, and 4854 for low-polar solvents and sharp slopes of 21838, 23295, and 23477 for high-polar solvents.

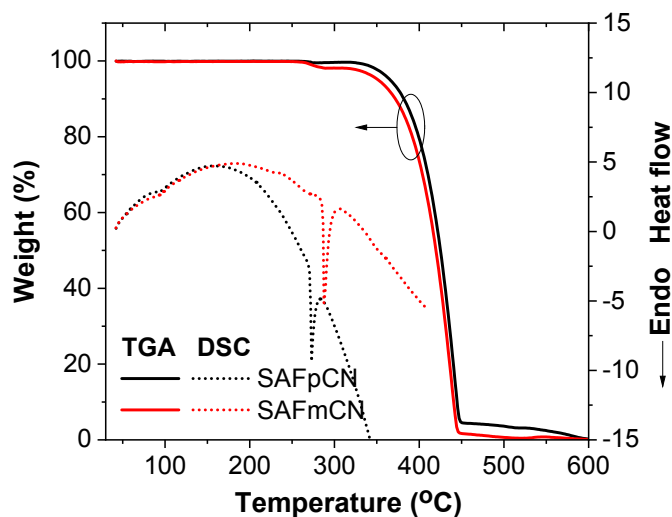

**Fig. S4** TGA and DSC (2<sup>nd</sup> heating scan) thermograms measured at heating rate of 10 °C min<sup>-1</sup> under N<sub>2</sub> flow.

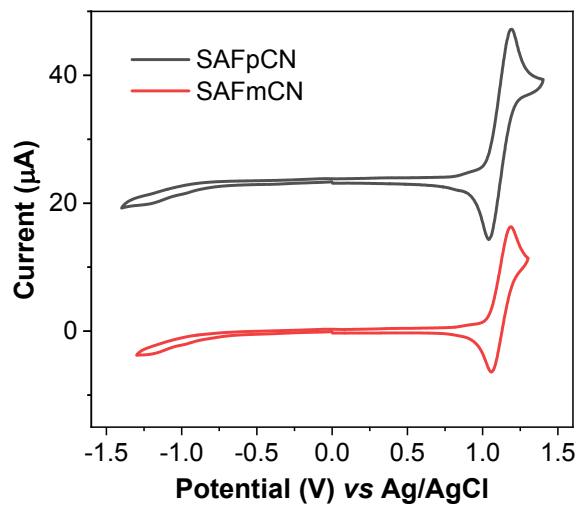

**Fig. S5** CV traces measured in  $\text{CH}_2\text{Cl}_2$  containing  $n\text{-Bu}_4\text{NPF}_6$  as a supporting electrolyte at a scan rate of  $50 \text{ mV s}^{-1}$  under Ar atmosphere.

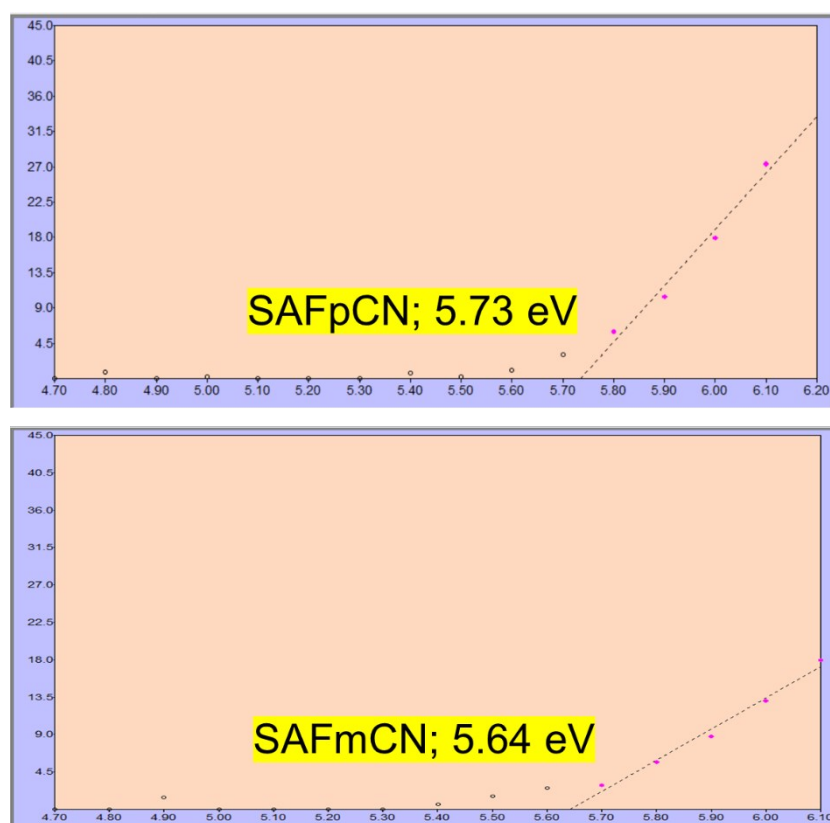

**Fig. S6** Photoemission yield spectroscopy in air (PYS) spectra.

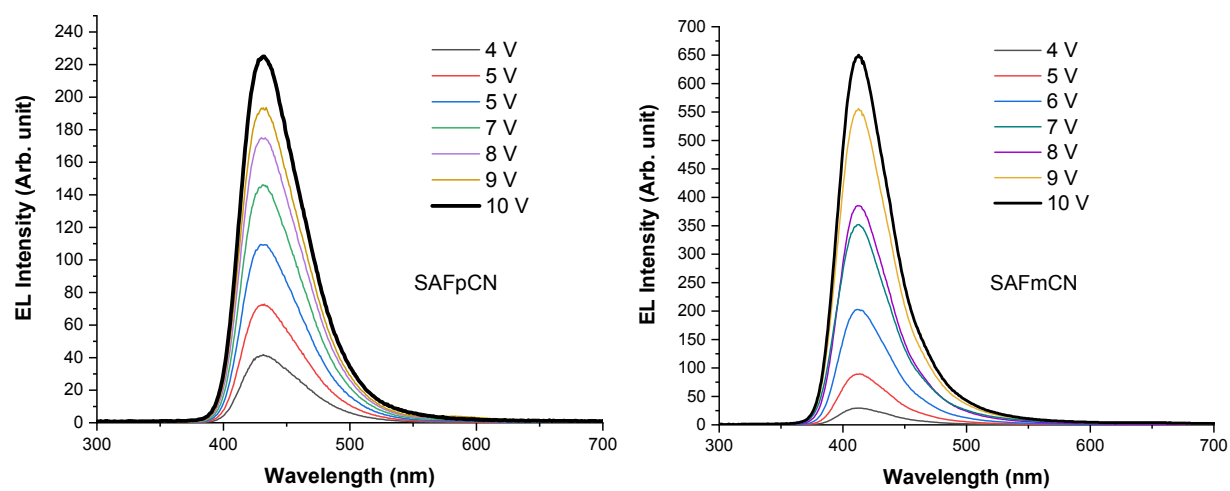

**Fig. S7** EL spectra of the fabricated OLEDs at different applied voltages.

### Reference

- 1) C. Feng, J. Li, X. Han, X. He, L. Liu, X. Li, X. Sun, P. Lu and Y. Ma, *Faraday Discuss.* 2017, **196**, 163-176.







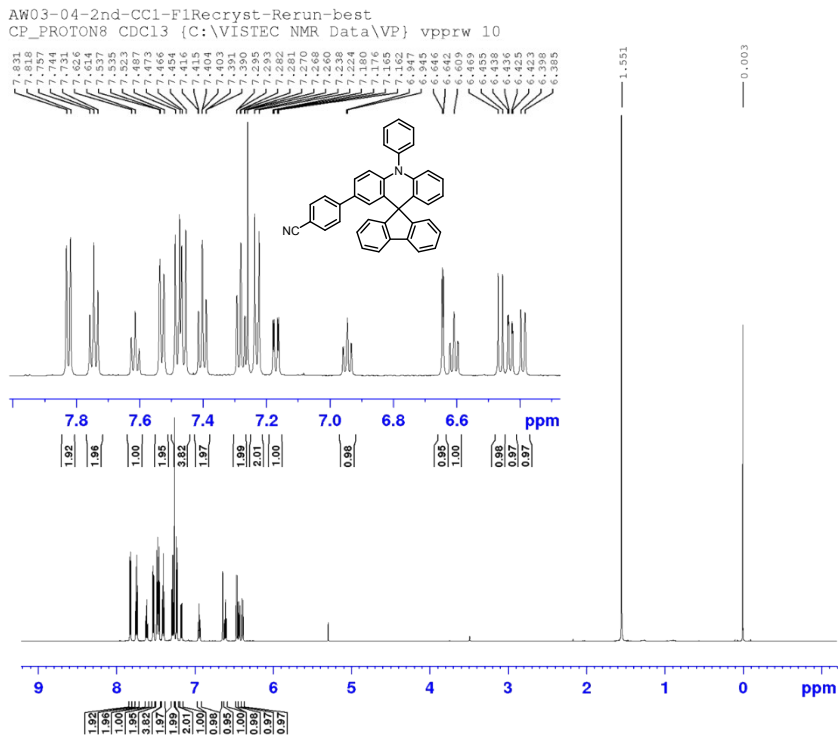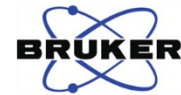

```
Current Data Parameters
NAME      AW03-04-2nd-CC1-F1Recryst-Rerun
EXPNO    1
PROCNO   1

F2 - Acquisition Parameters
Date_    20190819
Time     11:25 h
INSTRUM  spect
PROBHD   E115495_0005 (
PULPROG  zgpg
TD        65536
SOLVENT  CDCl3
NS        2
DS        2
SWH       12019.230 Hz
FIDRES   0.346798 Hz
AQ        2.7242974 sec
RG        370.88
DM        41.400 usec
DE        40.00 usec
TE        303.2 K
D1        1.00000000 sec
TEC
SFO1     600.137058 MHz
NUC1      1H
P2        3.47 usec
P1        11.00 usec
P1M1     19.9979919 W
P1M2
P1M3

F2 - Processing parameters
SI        65536
SF        600.1300150 MHz
WDW       EM
SSB       0
LB        0.30 Hz
GB        0
PC        1.00
```

The <sup>1</sup>H NMR spectrum of SAFpCN in CDCl<sub>3</sub> solution.

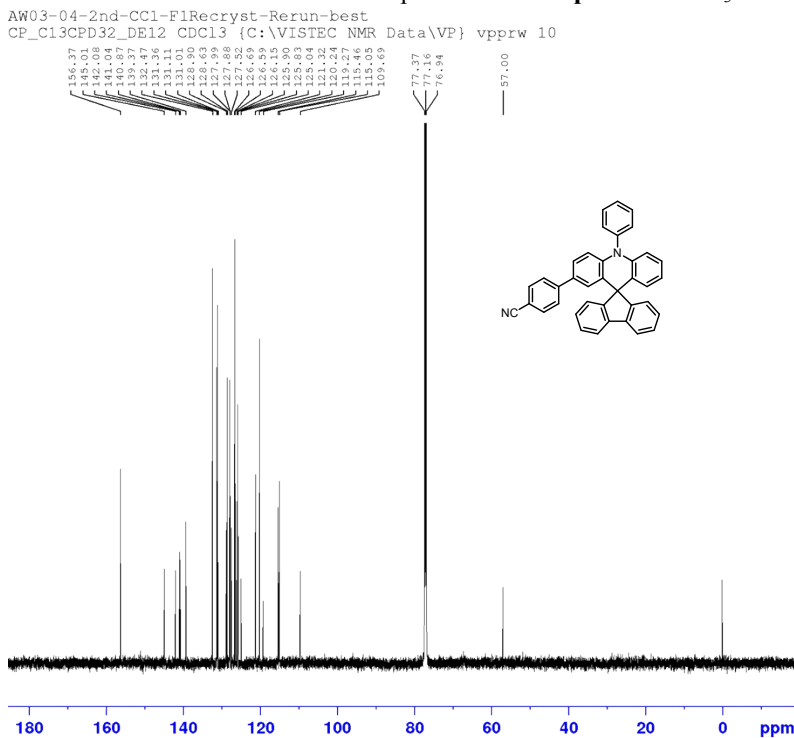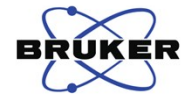

```
Current Data Parameters
NAME      AW03-04-2nd-CC1-F1Recryst-Rerun
EXPNO    2
PROCNO   1

F2 - Acquisition Parameters
Date_    20190819
Time     11:32 h
INSTRUM  spect
PROBHD   E115495_0005 (
PULPROG  zgpg
TD        65536
SOLVENT  CDCl3
NS        2
DS        2
SWH       36231.983 Hz
FIDRES   1.103709 Hz
AQ        0.3043968 sec
RG        191.56
DM        13.800 usec
DE        18.00 usec
TE        303.2 K
D1        2.00000000 sec
TEC
SFO1     150.9178974 MHz
NUC1      13C
P2        3.73 usec
P1        11.20 usec
P1M1     26.0000000 W
P1M2     600.1324000 MHz
MPC2
MPC3
MPC4
MPC5
MPC6
MPC7
MPC8
MPC9
MPC10
MPC11
MPC12
MPC13
MPC14
MPC15
MPC16
MPC17
MPC18
MPC19
MPC20
MPC21
MPC22
MPC23
MPC24
MPC25
MPC26
MPC27
MPC28
MPC29
MPC30
MPC31
MPC32
MPC33
MPC34
MPC35
MPC36
MPC37
MPC38
MPC39
MPC40
MPC41
MPC42
MPC43
MPC44
MPC45
MPC46
MPC47
MPC48
MPC49
MPC50
MPC51
MPC52
MPC53
MPC54
MPC55
MPC56
MPC57
MPC58
MPC59
MPC60
MPC61
MPC62
MPC63
MPC64
MPC65
MPC66
MPC67
MPC68
MPC69
MPC70
MPC71
MPC72
MPC73
MPC74
MPC75
MPC76
MPC77
MPC78
MPC79
MPC80
MPC81
MPC82
MPC83
MPC84
MPC85
MPC86
MPC87
MPC88
MPC89
MPC90
MPC91
MPC92
MPC93
MPC94
MPC95
MPC96
MPC97
MPC98
MPC99
MPC100
MPC101
MPC102
MPC103
MPC104
MPC105
MPC106
MPC107
MPC108
MPC109
MPC110
MPC111
MPC112
MPC113
MPC114
MPC115
MPC116
MPC117
MPC118
MPC119
MPC120
MPC121
MPC122
MPC123
MPC124
MPC125
MPC126
MPC127
MPC128
MPC129
MPC130
MPC131
MPC132
MPC133
MPC134
MPC135
MPC136
MPC137
MPC138
MPC139
MPC140
MPC141
MPC142
MPC143
MPC144
MPC145
MPC146
MPC147
MPC148
MPC149
MPC150
MPC151
MPC152
MPC153
MPC154
MPC155
MPC156
MPC157
MPC158
MPC159
MPC160
MPC161
MPC162
MPC163
MPC164
MPC165
MPC166
MPC167
MPC168
MPC169
MPC170
MPC171
MPC172
MPC173
MPC174
MPC175
MPC176
MPC177
MPC178
MPC179
MPC180
MPC181
MPC182
MPC183
MPC184
MPC185
MPC186
MPC187
MPC188
MPC189
MPC190
MPC191
MPC192
MPC193
MPC194
MPC195
MPC196
MPC197
MPC198
MPC199
MPC200
MPC201
MPC202
MPC203
MPC204
MPC205
MPC206
MPC207
MPC208
MPC209
MPC210
MPC211
MPC212
MPC213
MPC214
MPC215
MPC216
MPC217
MPC218
MPC219
MPC220
MPC221
MPC222
MPC223
MPC224
MPC225
MPC226
MPC227
MPC228
MPC229
MPC230
MPC231
MPC232
MPC233
MPC234
MPC235
MPC236
MPC237
MPC238
MPC239
MPC240
MPC241
MPC242
MPC243
MPC244
MPC245
MPC246
MPC247
MPC248
MPC249
MPC250
MPC251
MPC252
MPC253
MPC254
MPC255
MPC256
MPC257
MPC258
MPC259
MPC260
MPC261
MPC262
MPC263
MPC264
MPC265
MPC266
MPC267
MPC268
MPC269
MPC270
MPC271
MPC272
MPC273
MPC274
MPC275
MPC276
MPC277
MPC278
MPC279
MPC280
MPC281
MPC282
MPC283
MPC284
MPC285
MPC286
MPC287
MPC288
MPC289
MPC290
MPC291
MPC292
MPC293
MPC294
MPC295
MPC296
MPC297
MPC298
MPC299
MPC300
MPC301
MPC302
MPC303
MPC304
MPC305
MPC306
MPC307
MPC308
MPC309
MPC310
MPC311
MPC312
MPC313
MPC314
MPC315
MPC316
MPC317
MPC318
MPC319
MPC320
MPC321
MPC322
MPC323
MPC324
MPC325
MPC326
MPC327
MPC328
MPC329
MPC330
MPC331
MPC332
MPC333
MPC334
MPC335
MPC336
MPC337
MPC338
MPC339
MPC340
MPC341
MPC342
MPC343
MPC344
MPC345
MPC346
MPC347
MPC348
MPC349
MPC350
MPC351
MPC352
MPC353
MPC354
MPC355
MPC356
MPC357
MPC358
MPC359
MPC360
MPC361
MPC362
MPC363
MPC364
MPC365
MPC366
MPC367
MPC368
MPC369
MPC370
MPC371
MPC372
MPC373
MPC374
MPC375
MPC376
MPC377
MPC378
MPC379
MPC380
MPC381
MPC382
MPC383
MPC384
MPC385
MPC386
MPC387
MPC388
MPC389
MPC390
MPC391
MPC392
MPC393
MPC394
MPC395
MPC396
MPC397
MPC398
MPC399
MPC400
MPC401
MPC402
MPC403
MPC404
MPC405
MPC406
MPC407
MPC408
MPC409
MPC410
MPC411
MPC412
MPC413
MPC414
MPC415
MPC416
MPC417
MPC418
MPC419
MPC420
MPC421
MPC422
MPC423
MPC424
MPC425
MPC426
MPC427
MPC428
MPC429
MPC430
MPC431
MPC432
MPC433
MPC434
MPC435
MPC436
MPC437
MPC438
MPC439
MPC440
MPC441
MPC442
MPC443
MPC444
MPC445
MPC446
MPC447
MPC448
MPC449
MPC450
MPC451
MPC452
MPC453
MPC454
MPC455
MPC456
MPC457
MPC458
MPC459
MPC460
MPC461
MPC462
MPC463
MPC464
MPC465
MPC466
MPC467
MPC468
MPC469
MPC470
MPC471
MPC472
MPC473
MPC474
MPC475
MPC476
MPC477
MPC478
MPC479
MPC480
MPC481
MPC482
MPC483
MPC484
MPC485
MPC486
MPC487
MPC488
MPC489
MPC490
MPC491
MPC492
MPC493
MPC494
MPC495
MPC496
MPC497
MPC498
MPC499
MPC500
MPC501
MPC502
MPC503
MPC504
MPC505
MPC506
MPC507
MPC508
MPC509
MPC510
MPC511
MPC512
MPC513
MPC514
MPC515
MPC516
MPC517
MPC518
MPC519
MPC520
MPC521
MPC522
MPC523
MPC524
MPC525
MPC526
MPC527
MPC528
MPC529
MPC530
MPC531
MPC532
MPC533
MPC534
MPC535
MPC536
MPC537
MPC538
MPC539
MPC540
MPC541
MPC542
MPC543
MPC544
MPC545
MPC546
MPC547
MPC548
MPC549
MPC550
MPC551
MPC552
MPC553
MPC554
MPC555
MPC556
MPC557
MPC558
MPC559
MPC560
MPC561
MPC562
MPC563
MPC564
MPC565
MPC566
MPC567
MPC568
MPC569
MPC570
MPC571
MPC572
MPC573
MPC574
MPC575
MPC576
MPC577
MPC578
MPC579
MPC580
MPC581
MPC582
MPC583
MPC584
MPC585
MPC586
MPC587
MPC588
MPC589
MPC590
MPC591
MPC592
MPC593
MPC594
MPC595
MPC596
MPC597
MPC598
MPC599
MPC600
MPC601
MPC602
MPC603
MPC604
MPC605
MPC606
MPC607
MPC608
MPC609
MPC610
MPC611
MPC612
MPC613
MPC614
MPC615
MPC616
MPC617
MPC618
MPC619
MPC620
MPC621
MPC622
MPC623
MPC624
MPC625
MPC626
MPC627
MPC628
MPC629
MPC630
MPC631
MPC632
MPC633
MPC634
MPC635
MPC636
MPC637
MPC638
MPC639
MPC640
MPC641
MPC642
MPC643
MPC644
MPC645
MPC646
MPC647
MPC648
MPC649
MPC650
MPC651
MPC652
MPC653
MPC654
MPC655
MPC656
MPC657
MPC658
MPC659
MPC660
MPC661
MPC662
MPC663
MPC664
MPC665
MPC666
MPC667
MPC668
MPC669
MPC670
MPC671
MPC672
MPC673
MPC674
MPC675
MPC676
MPC677
MPC678
MPC679
MPC680
MPC681
MPC682
MPC683
MPC684
MPC685
MPC686
MPC687
MPC688
MPC689
MPC690
MPC691
MPC692
MPC693
MPC694
MPC695
MPC696
MPC697
MPC698
MPC699
MPC700
MPC701
MPC702
MPC703
MPC704
MPC705
MPC706
MPC707
MPC708
MPC709
MPC710
MPC711
MPC712
MPC713
MPC714
MPC715
MPC716
MPC717
MPC718
MPC719
MPC720
MPC721
MPC722
MPC723
MPC724
MPC725
MPC726
MPC727
MPC728
MPC729
MPC730
MPC731
MPC732
MPC733
MPC734
MPC735
MPC736
MPC737
MPC738
MPC739
MPC740
MPC741
MPC742
MPC743
MPC744
MPC745
MPC746
MPC747
MPC748
MPC749
MPC750
MPC751
MPC752
MPC753
MPC754
MPC755
MPC756
MPC757
MPC758
MPC759
MPC760
MPC761
MPC762
MPC763
MPC764
MPC765
MPC766
MPC767
MPC768
MPC769
MPC770
MPC771
MPC772
MPC773
MPC774
MPC775
MPC776
MPC777
MPC778
MPC779
MPC780
MPC781
MPC782
MPC783
MPC784
MPC785
MPC786
MPC787
MPC788
MPC789
MPC790
MPC791
MPC792
MPC793
MPC794
MPC795
MPC796
MPC797
MPC798
MPC799
MPC800
MPC801
MPC802
MPC803
MPC804
MPC805
MPC806
MPC807
MPC808
MPC809
MPC810
MPC811
MPC812
MPC813
MPC814
MPC815
MPC816
MPC817
MPC818
MPC819
MPC820
MPC821
MPC822
MPC823
MPC824
MPC825
MPC826
MPC827
MPC828
MPC829
MPC830
MPC831
MPC832
MPC833
MPC834
MPC835
MPC836
MPC837
MPC838
MPC839
MPC840
MPC841
MPC842
MPC843
MPC844
MPC845
MPC846
MPC847
MPC848
MPC849
MPC850
MPC851
MPC852
MPC853
MPC854
MPC855
MPC856
MPC857
MPC858
MPC859
MPC860
MPC861
MPC862
MPC863
MPC864
MPC865
MPC866
MPC867
MPC868
MPC869
MPC870
MPC871
MPC872
MPC873
MPC874
MPC875
MPC876
MPC877
MPC878
MPC879
MPC880
MPC881
MPC882
MPC883
MPC884
MPC885
MPC886
MPC887
MPC888
MPC889
MPC890
MPC891
MPC892
MPC893
MPC894
MPC895
MPC896
MPC897
MPC898
MPC899
MPC900
MPC901
MPC902
MPC903
MPC904
MPC905
MPC906
MPC907
MPC908
MPC909
MPC910
MPC911
MPC912
MPC913
MPC914
MPC915
MPC916
MPC917
MPC918
MPC919
MPC920
MPC921
MPC922
MPC923
MPC924
MPC925
MPC926
MPC927
MPC928
MPC929
MPC930
MPC931
MPC932
MPC933
MPC934
MPC935
MPC936
MPC937
MPC938
MPC939
MPC940
MPC941
MPC942
MPC943
MPC944
MPC945
MPC946
MPC947
MPC948
MPC949
MPC950
MPC951
MPC952
MPC953
MPC954
MPC955
MPC956
MPC957
MPC958
MPC959
MPC960
MPC961
MPC962
MPC963
MPC964
MPC965
MPC966
MPC967
MPC968
MPC969
MPC970
MPC971
MPC972
MPC973
MPC974
MPC975
MPC976
MPC977
MPC978
MPC979
MPC980
MPC981
MPC982
MPC983
MPC984
MPC985
MPC986
MPC987
MPC988
MPC989
MPC990
MPC991
MPC992
MPC993
MPC994
MPC995
MPC996
MPC997
MPC998
MPC999
MPC1000

F2 - Processing parameters
SI        32768
SF        150.9027860 MHz
WDW       EM
SSB       0
LB        1.00 Hz
GB        0
PC        1.40
```

The <sup>13</sup>C NMR spectrum of SAFpCN in CDCl<sub>3</sub> solution.

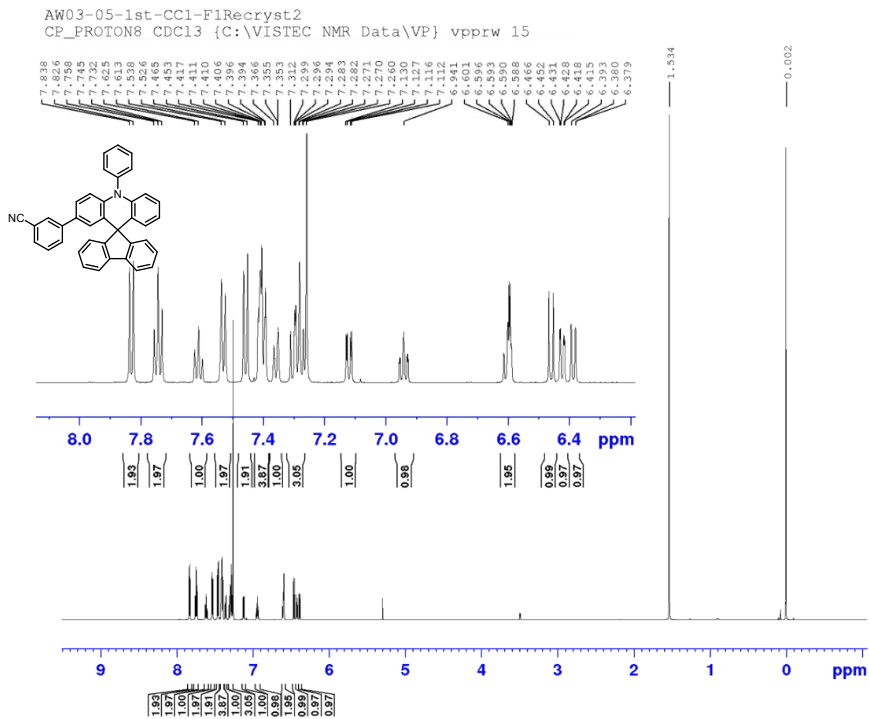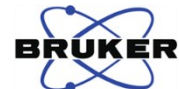

The <sup>1</sup>H NMR spectrum of SAFmCN in CDCl<sub>3</sub> solution.

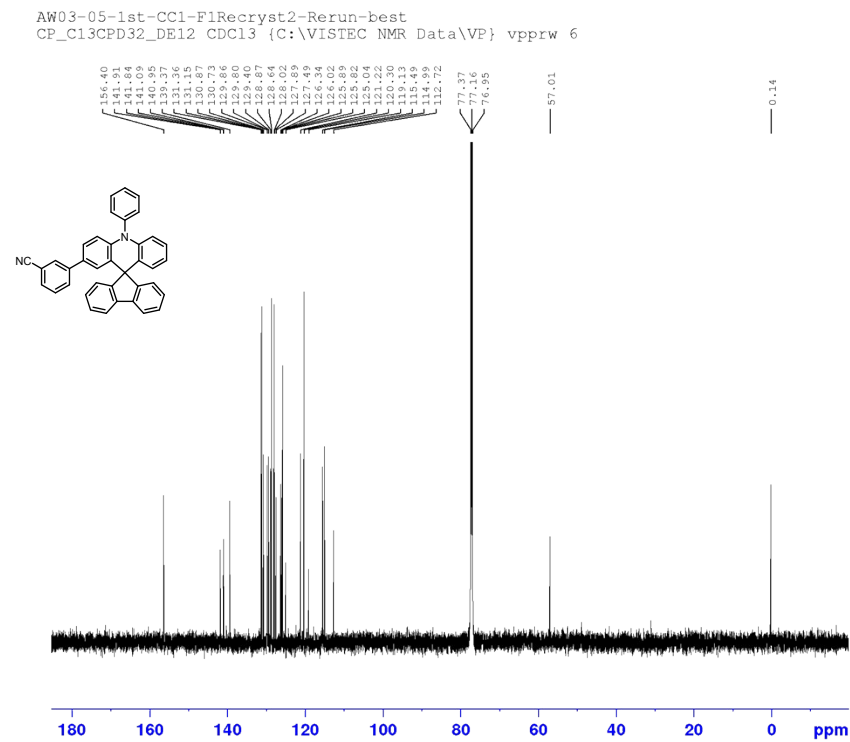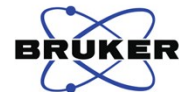

The <sup>13</sup>C NMR spectrum of SAFmCN in CDCl<sub>3</sub> solution.

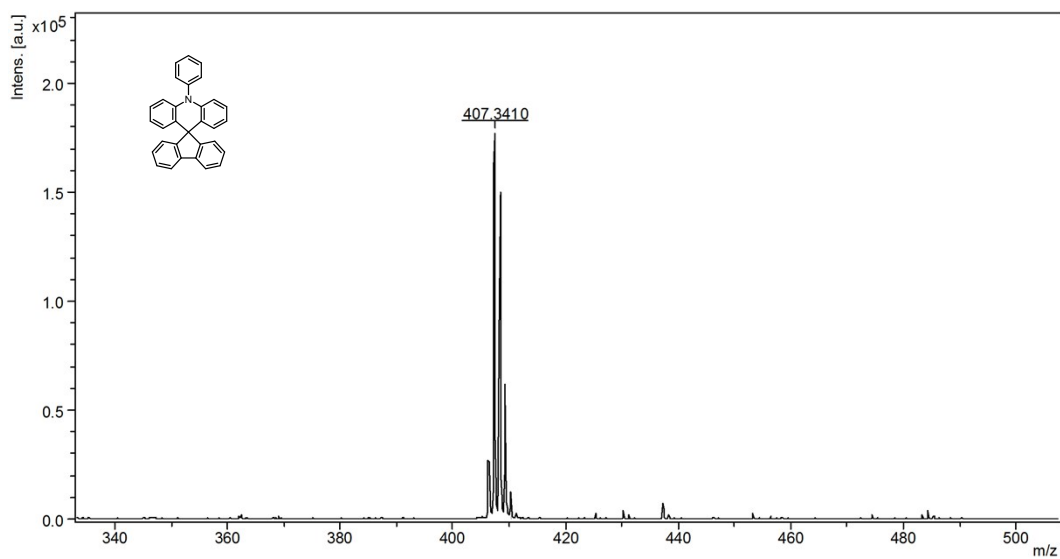

The MALDI-TOF spectra of **1**.

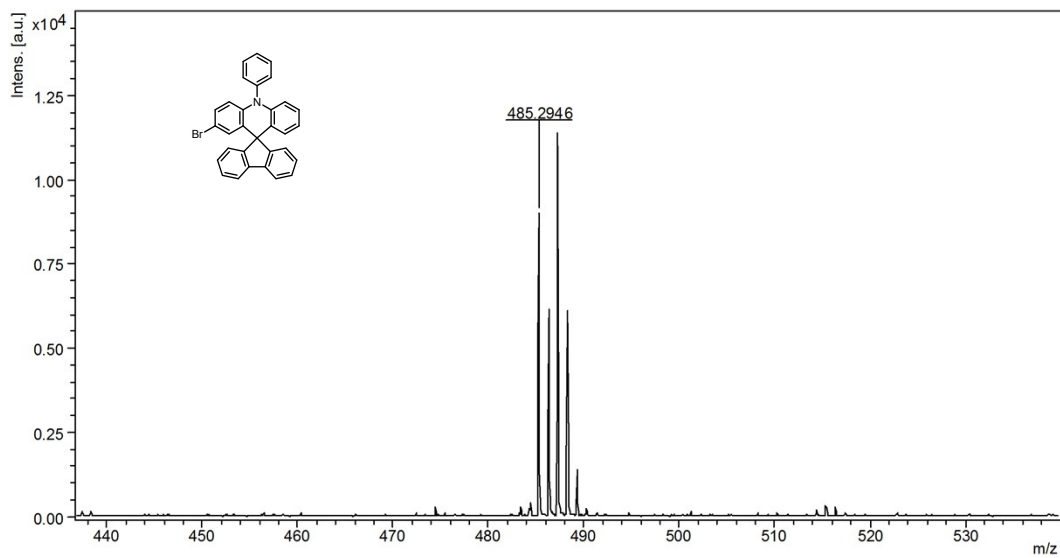

The MALDI-TOF spectrum of **2**.

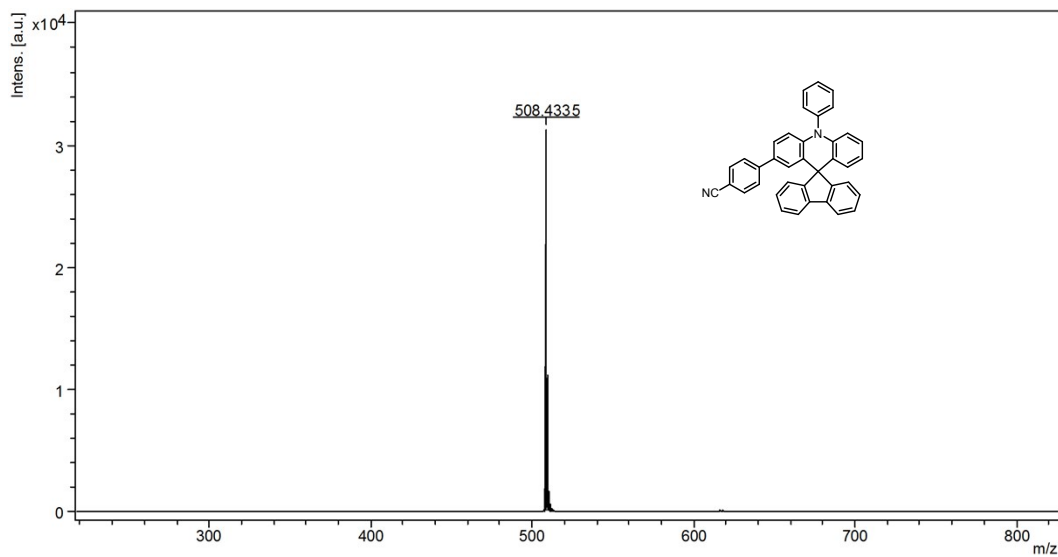

The MALDI-TOF spectrum of SAFpCN

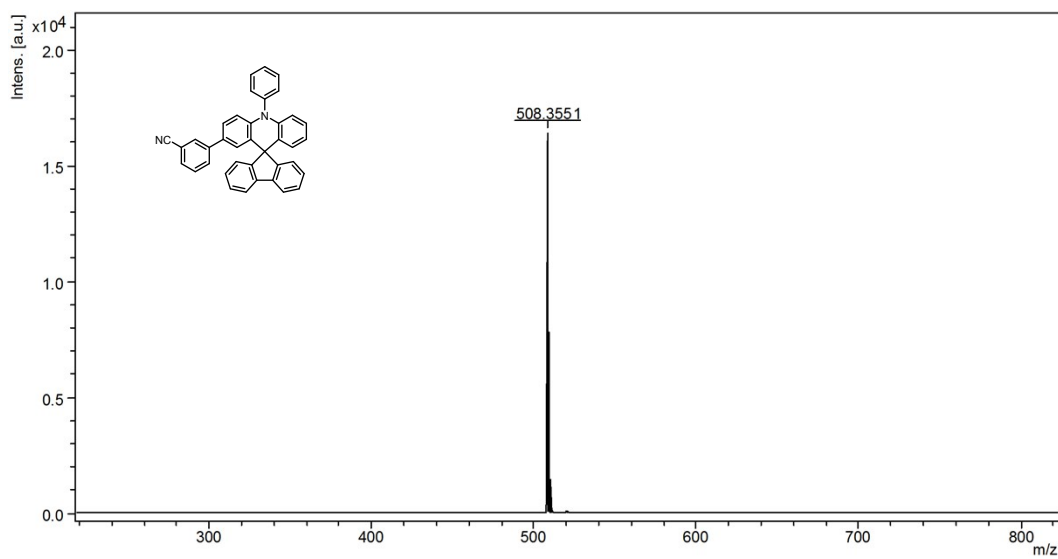

The MALDI-TOF spectrum of SAFmCN
